# Supplementary material
Source: Springer Nature journal article supplement (https://www.springermedizin.de/resource/supplementary/13012_2009_168_MOESM1_ESM.pdf/9629384)
Supplement: MOESM1 [file 9629384]

## **Influencing Factors**

Knowledge of implementation

- Instructional guidance
- Training

Incentives for implementation

- Explicit responsibility
- Integrated with strategic plan

Capacity for implementation

- Dedicated budget
- Operational plan, infrastructure

Perceptions about implementation

- Advantage
- Trialability
- Compatibility
- Uncertainty
- Complexity

## **Guideline Implementation**

Create 'implementable' guidelines

- Format
  - Publicly available
  - Versions for differing purposes
  - Organization of content
- Content
  - Presentation of evidence
  - Clinical considerations
  - Information for care recipients
  - Individual/organizational impact
  - Barriers of adoption
  - Options for implementation
  - Guidance for evaluation

Identify barriers through needs assessment

Tailor and apply implementation interventions

Evaluate and monitor outcomes

## **User Attitude/Confidence in Guideline/Adoption Decisions**

Evidence informed

- Accessibility
- Useability
- Clarity
- Validity

Experiential/intuitive

- Applicability

Shared

- Communicability

Naturalistic

- Balance opposing values
- Prioritization
- Accommodation
- Resource mobilization
